# Supplementary material for: How Should the Worldwide Knowledge of Traditional Cancer Healing Be Integrated with Herbs and Mushrooms into Modern Molecular Pharmacology?
Source: MDPI journal article supplement (doi:10.3390/ph15070868), 2022-07-14
Supplement: s1 [file s1]

| Combination chemotherapy regimens | Components                                                                                                                                                     |
|-----------------------------------|----------------------------------------------------------------------------------------------------------------------------------------------------------------|
| ABVD                              | Doxorubicin Hydrochloride (Adriamycin), Bleomycin, Vinblastine Sulfate, Dacarbazine                                                                            |
| ABVE                              | Doxorubicin Hydrochloride (Adriamycin), Bleomycin, Vincristine Sulfate, Etoposide Phosphate                                                                    |
| ABVE-PC                           | Doxorubicin Hydrochloride (Adriamycin), Bleomycin, Vincristine Sulfate, Etoposide Phosphate, Prednisone, Cyclophosphamide                                      |
| AC                                | Doxorubicin Hydrochloride (Adriamycin), Cyclophosphamide                                                                                                       |
| AC-T                              | Doxorubicin Hydrochloride (Adriamycin), Cyclophosphamide, Paclitaxel (Taxol)                                                                                   |
| ADE                               | Cytarabine (Ara-C), Daunorubicin Hydrochloride, Etoposide Phosphate                                                                                            |
| BEACOPP                           | Bleomycin Etoposide, Phosphate Doxorubicin Hydrochloride (Adriamycin), Cyclophosphamide, Vincristine Sulfate (Oncovin), Procarbazine Hydrochloride, Prednisone |
| BEP                               | Bleomycin, Etoposide Phosphate, Cisplatin                                                                                                                      |
| CAF                               | Cyclophosphamide, Doxorubicin Hydrochloride (Adriamycin), Fluorouracil                                                                                         |
| CEM                               | Carboplatin Etoposide Phosphate Melphalan Hydrochloride                                                                                                        |
| CEV                               | Carboplatin, Etoposide Phosphate, Vincristine Sulfate                                                                                                          |
| CHOP                              | Cyclophosphamide, Doxorubicin hydrochloride (Hydroxydaunorubicin), vincristine sulfate (Oncovin), Prednisone                                                   |
| COPDAC                            | Cyclophosphamide, Vincristine Sulfate (Oncovin), Prednisone, Dacarbazine                                                                                       |
| COPP                              | Cyclophosphamide, Vincristine Sulfate (Oncovin), Procarbazine Hydrochloride, Prednisone                                                                        |
| COPP-ABV                          | Cyclophosphamide, Vincristine Sulfate (Oncovin), Procarbazine Hydrochloride, Prednisone, Bleomycin, Vinblastine Sulfate                                        |
| CVP                               | Cyclophosphamide, Vincristine Sulfate, Prednisone                                                                                                              |
| EPOCH                             | Etoposide Phosphate, Prednisone, Vincristine Sulfate (Oncovin), Cyclophosphamide, Doxorubicine Hydrochloride (Hydroxydaunomycin)                               |
| FOLFIRI                           | Leucovorin (Folinic Acid), Fluorouracil, Irinotecan Hydrochloride                                                                                              |
| FOLFIRI-BEVACIZUMAB               | Leucovorin Calcium (Folinic Acid), Fluorouracil, Irinotecan Hydrochloride, Bevacizumab                                                                         |

|                   |                                                                                                                                                                                                             |
|-------------------|-------------------------------------------------------------------------------------------------------------------------------------------------------------------------------------------------------------|
| FOLFIRI-CETUXIMAB | FOL <sup>®</sup> Leucovorin Calcium (Folinic Acid)<br>F <sup>®</sup> Fluorouracil<br>IRI <sup>®</sup> Irinotecan Hydrochloride<br>+ Cetuximab                                                               |
| FOLFIRINOX        | FOL <sup>®</sup> Leucovorin Calcium (Folinic Acid)<br>F <sup>®</sup> Fluorouracil<br>IRIN <sup>®</sup> Irinotecan Hydrochloride<br>OX <sup>®</sup> Oxaliplatin                                              |
| hyper-CVAD        | C <sup>®</sup> Cyclophosphamide<br>V <sup>®</sup> Vincristine Sulfate<br>A <sup>®</sup> Doxorubicin Hydrochloride (Adriamycin)<br>D <sup>®</sup> Dexamethasone                                              |
| ICE               | I <sup>®</sup> Ifosfamide<br>C <sup>®</sup> Carboplatin<br>E <sup>®</sup> Etoposide Phosphate                                                                                                               |
| JEB               | J <sup>®</sup> Carboplatin (JM8)<br>E <sup>®</sup> Etoposide Phosphate<br>B <sup>®</sup> Bleomycin                                                                                                          |
| MVAC              | M <sup>®</sup> Methotrexate<br>V <sup>®</sup> Vinblastine Sulfate<br>A <sup>®</sup> Doxorubicin Hydrochloride (Adriamycin)<br>C <sup>®</sup> Cisplatin                                                      |
| OEPA              | O <sup>®</sup> Vincristine Sulfate (Oncovin)<br>E <sup>®</sup> Etoposide Phosphate<br>P <sup>®</sup> Prednisone<br>A <sup>®</sup> Doxorubicin Hydrochloride (Adriamycin)                                    |
| OPPA              | O <sup>®</sup> Vincristine Sulfate (Oncovin)<br>P <sup>®</sup> Procarbazine Hydrochloride<br>P <sup>®</sup> Prednisone<br>A <sup>®</sup> Doxorubicin Hydrochloride (Adriamycin)                             |
| PAD               | P <sup>®</sup> Bortezomib (PS-341)<br>A <sup>®</sup> Doxorubicin Hydrochloride (Adriamycin)<br>D <sup>®</sup> Dexamethasone                                                                                 |
| PCV               | P <sup>®</sup> Procarbazine Hydrochloride<br>C <sup>®</sup> Lomustine (CCNU)<br>V <sup>®</sup> Vincristine Sulfate                                                                                          |
| PEB               | P <sup>®</sup> Cisplatin (Platinol)<br>E <sup>®</sup> Etoposide Phosphate<br>B <sup>®</sup> Bleomycin                                                                                                       |
| R-CHOP            | R <sup>®</sup> Rituximab<br>C <sup>®</sup> Cyclophosphamide<br>H <sup>®</sup> Doxorubicin Hydrochloride<br>(Hydroxydaunomycin)<br>O <sup>®</sup> Vincristine Sulfate (Oncovin)<br>P <sup>®</sup> Prednisone |
| R-CVP             | R <sup>®</sup> Rituximab<br>C <sup>®</sup> Cyclophosphamide<br>V <sup>®</sup> Vincristine Sulfate<br>P <sup>®</sup> Prednisone                                                                              |

|            |                                                                                                                                                                             |
|------------|-----------------------------------------------------------------------------------------------------------------------------------------------------------------------------|
| R-EPOCH    | R☹ Rituximab<br>E☹ Etoposide Phosphate<br>P☹ Prednisone<br>O☹ Vincristine Sulfate (Oncovin)<br>C☹ Cyclophosphamide<br>H☹ Doxorubicin Hydrochloride<br>(Hydroxydaunorubicin) |
| R-ICE      | R☹ Rituximab<br>I☹ Ifosfamide<br>C☹ Carboplatin<br>E☹ Etoposide Phosphate                                                                                                   |
| STANFORD V | M☹ Mechlorethamine Hydrochloride<br>Doxorubicin Hydrochloride<br>Vinblastine Sulfate<br>Vincristine Sulfate<br>Bleomycin<br>Etoposide Phosphate<br>Prednisone               |
| TAC        | T☹ Docetaxel (Taxotere)<br>A☹ Doxorubicin Hydrochloride (Adriamycin)<br>C☹ Cyclophosphamide                                                                                 |
| VAC        | V☹ Vincristine Sulfate<br>A☹ Dactinomycin (Actinomycin-D)<br>C☹ Cyclophosphamide                                                                                            |
| VAMP       | V☹ Vincristine Sulfate<br>A☹ Doxorubicin Hydrochloride (Adriamycin)<br>M☹ Methotrexate<br>P☹ Prednisone                                                                     |
| VeIP       | Ve☹ Vinblastine Sulfate (Velban)<br>I☹ Ifosfamide<br>P☹ Cisplatin (Platinol)                                                                                                |
| VIP        | V☹ Etoposide (VP-16)<br>I☹ Ifosfamide<br>P☹ Cisplatin (Platinol)                                                                                                            |
| XELIRI     | XEL☹ Capecitabine (Xeloda)<br>IRI☹ Irinotecan Hydrochloride                                                                                                                 |
