# Supplementary material for: How Should the Worldwide Knowledge of Traditional Cancer Healing Be Integrated with Herbs and Mushrooms into Modern Molecular Pharmacology?
Source: MDPI journal article supplement (doi:10.3390/ph15070868), 2022-07-14
Supplement: s1 [file s1]

***Hypericum perforatum***

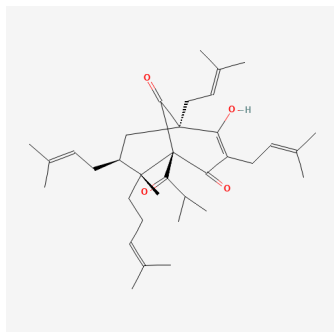

Hyperforin

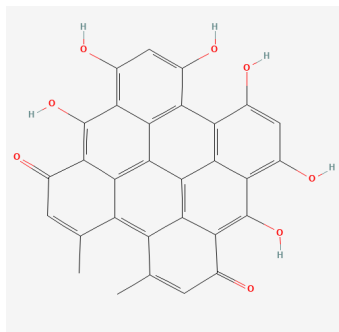

Hypericin

***Betula pubescens***

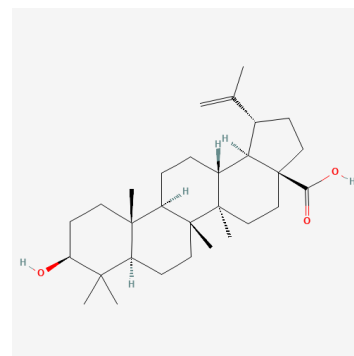

Betulinic acid

***Glycyrrhiza glabra***

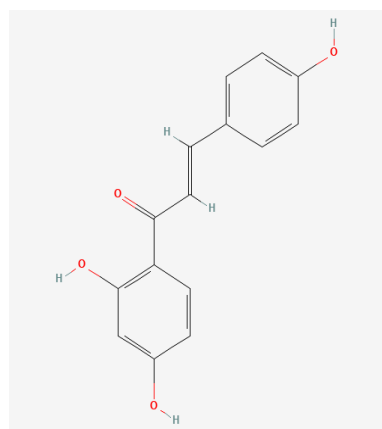

Isoliquiritigenin

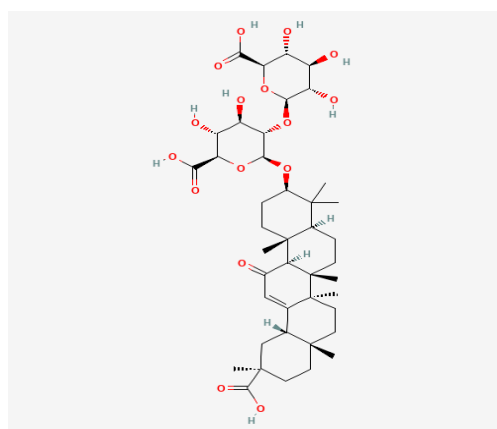

Glycyrrhizin

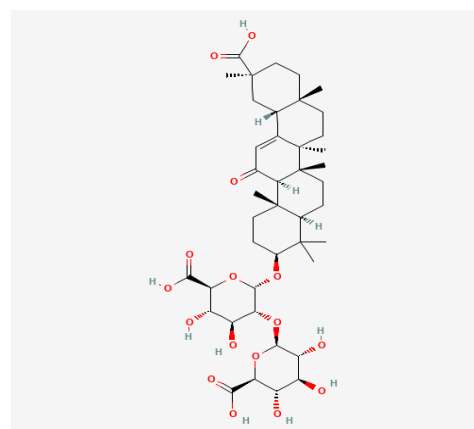

Glycyrrhizinic acid

***Cephalotaxus harringtonia***

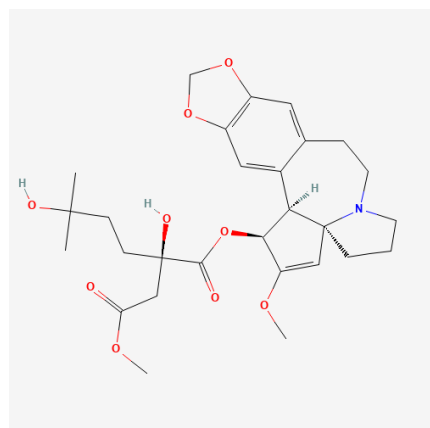

Harringtonin

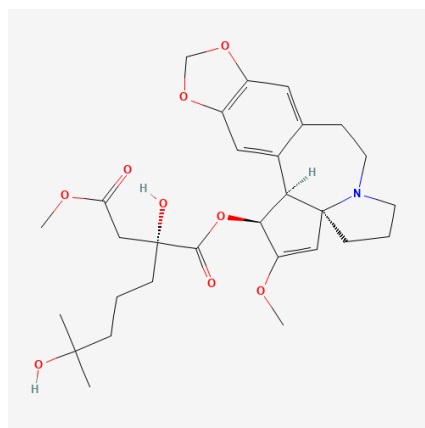

Homoharringtonin

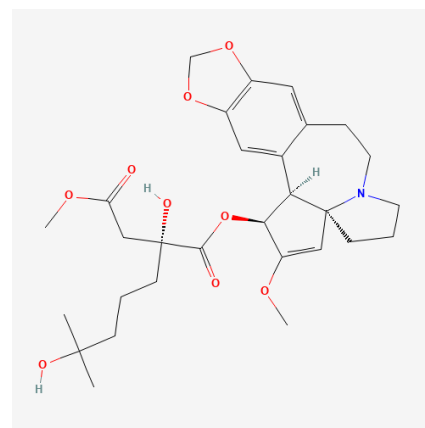

Omacetaxine

***Scutellaria barbata***

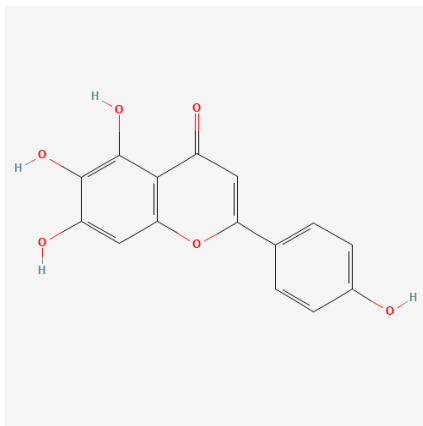

Scutellarein

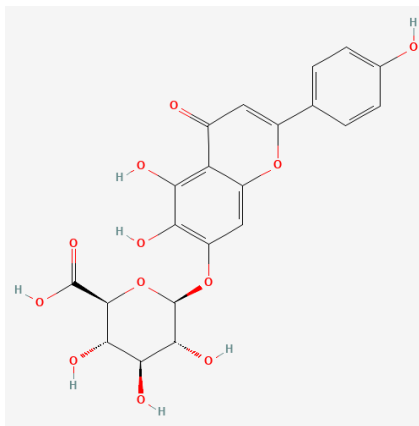

Scutellarin

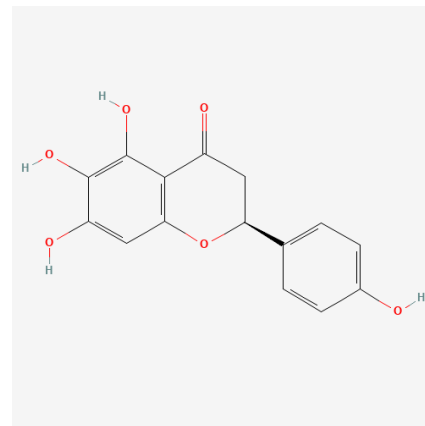

Carthamidin

***Withania somnifera***

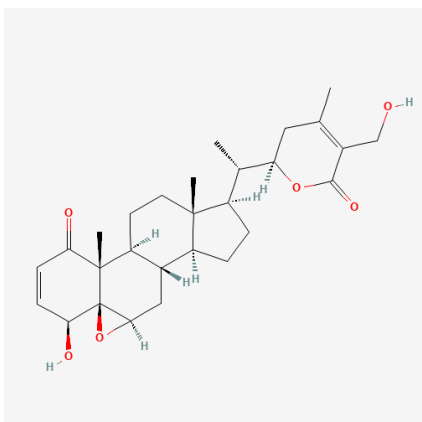

Withaferin A

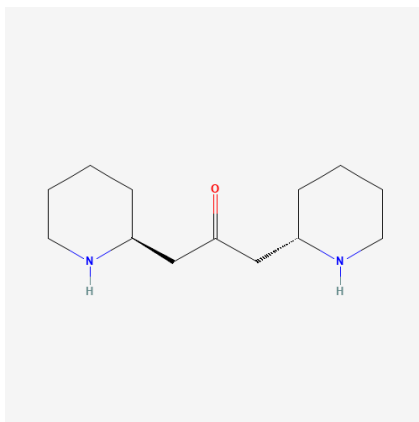

Anaferine

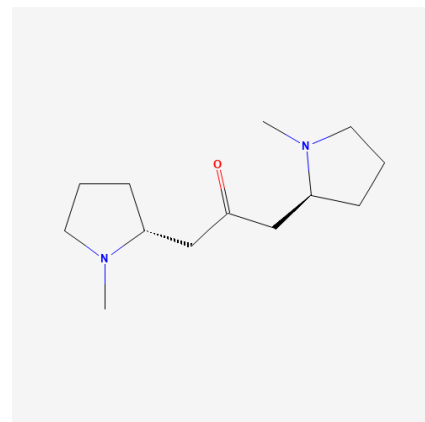

Cuseohygrine

***Guera senegalis***

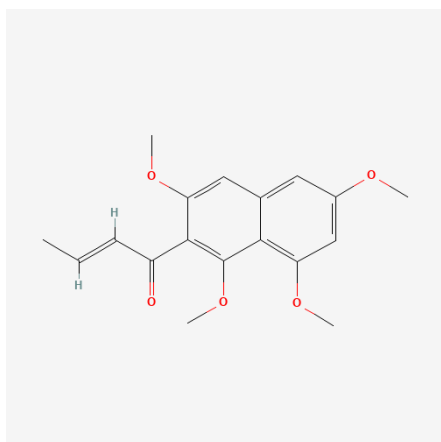

Guieranone A

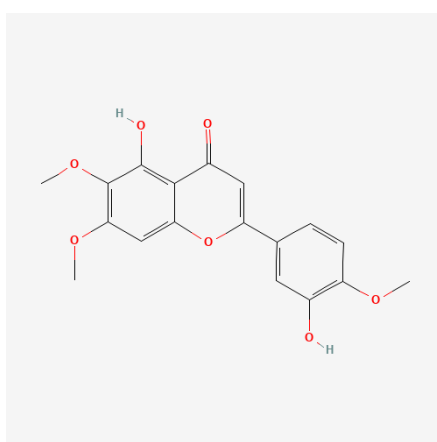

Eupatorin

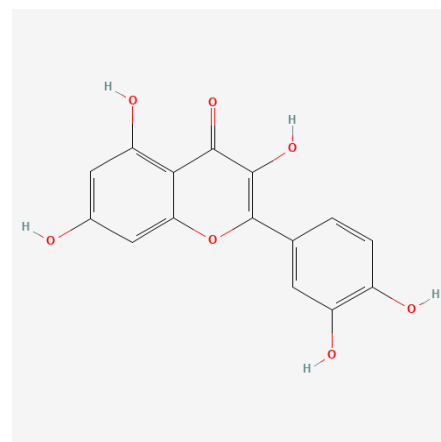

Quercetin

*Acacia nilotica*

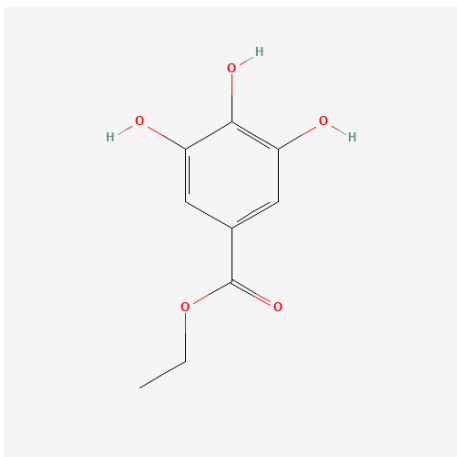

Ethylgallate

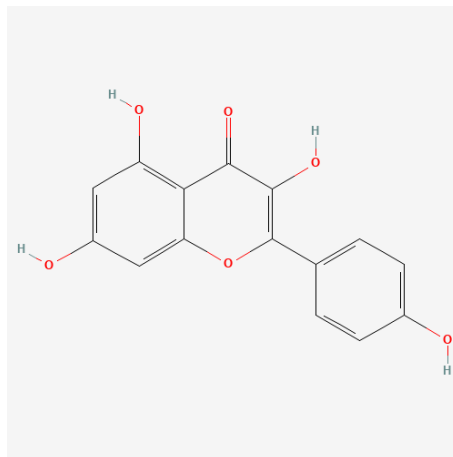

Kaempferol

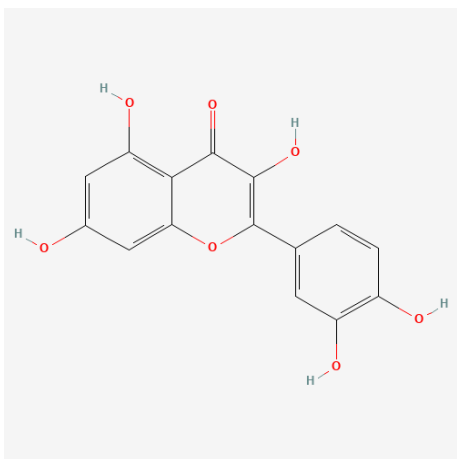

Quercetin

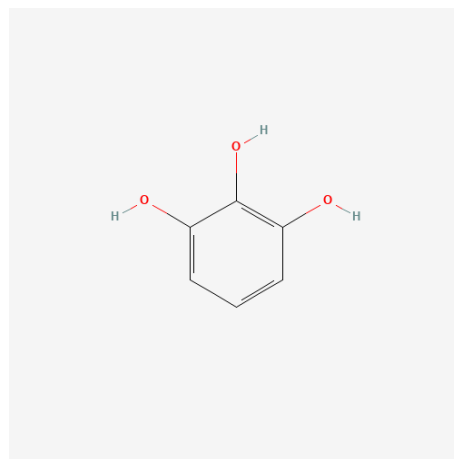

Pyrogallol

*Xanthium spinosum*

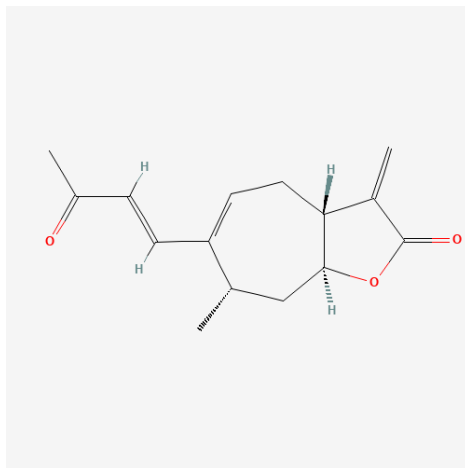

Xanthatin

*Oldenlandia diffusa*

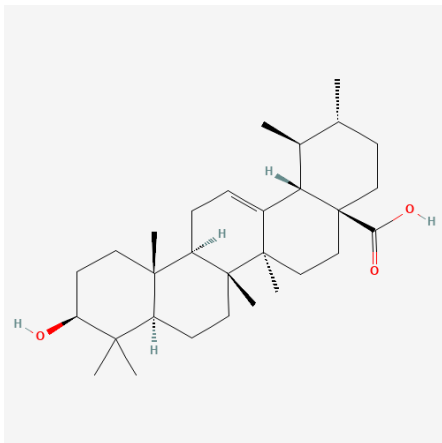

Ursolic acid

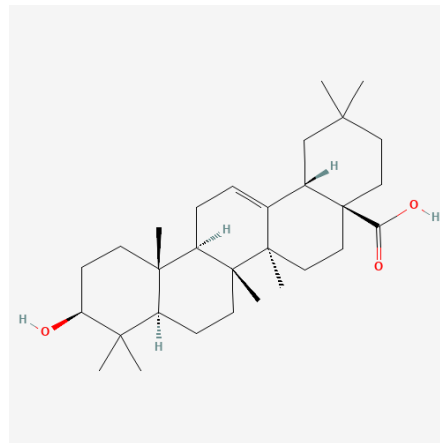

Oleanolic acid

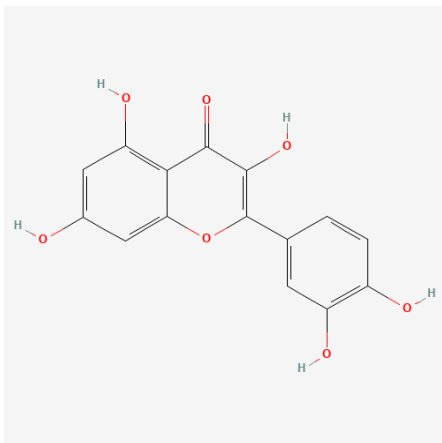

Quercetin

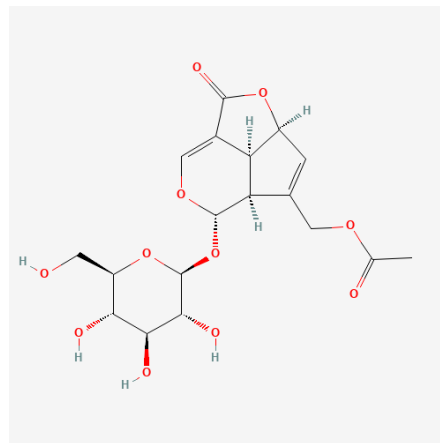

Asperuloside

*Curcuma longa*

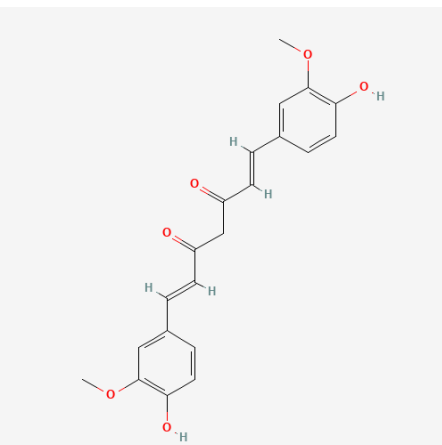

Curcumin

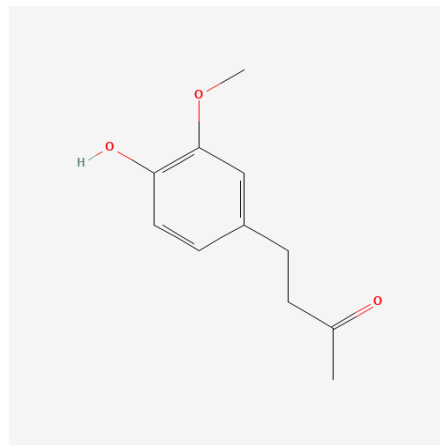

Zingiberone

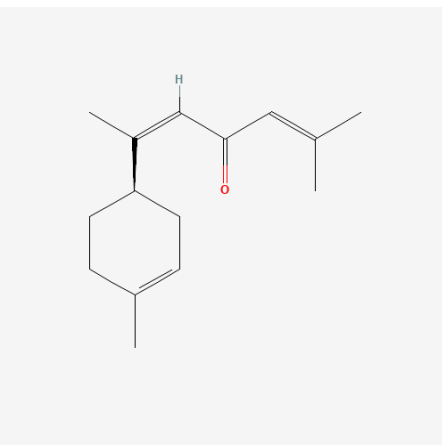

Atlantone

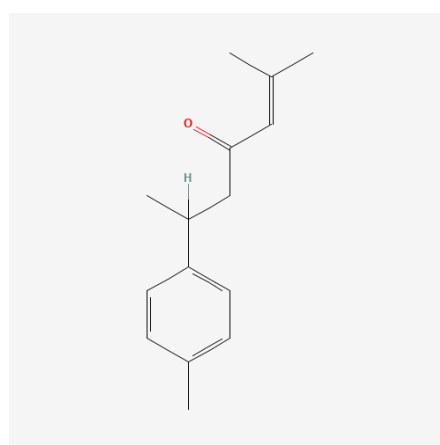

Tumerone

*Silybum marianum*

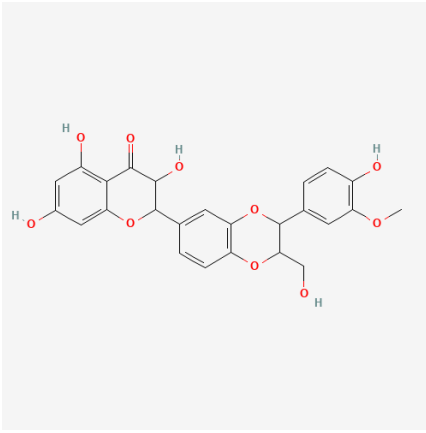

Symilarin

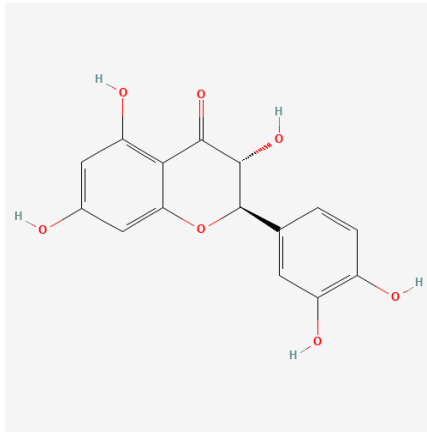

Taxifolin

*Capsicum frutescens*

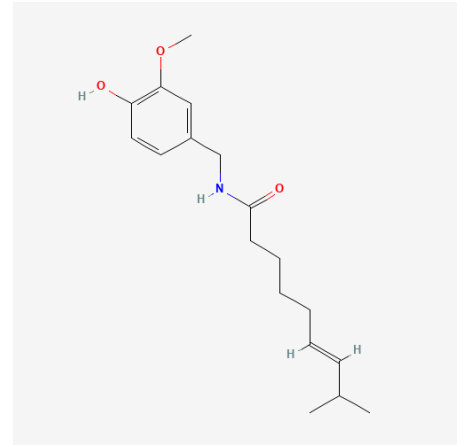

Capsaicin

*Aloe vera and Aloe arborescens*

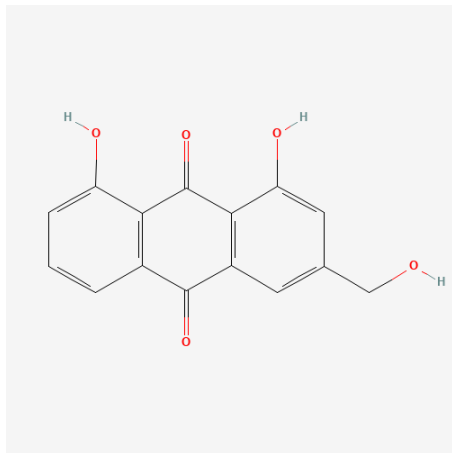

Aloe-emodin

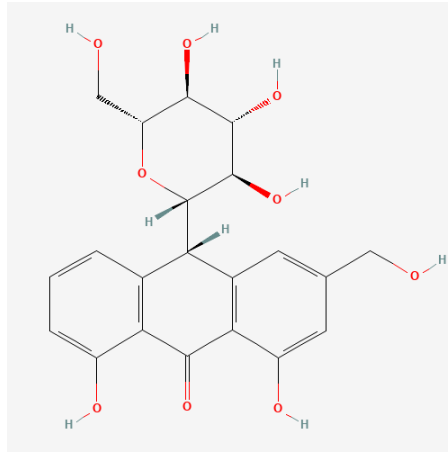

Barbaloin

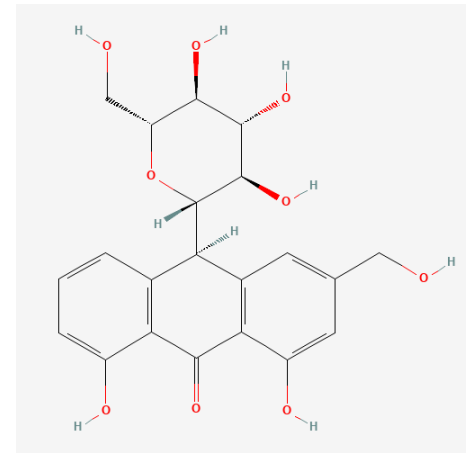

Isobarbaloin

*Panax quinquefolius*

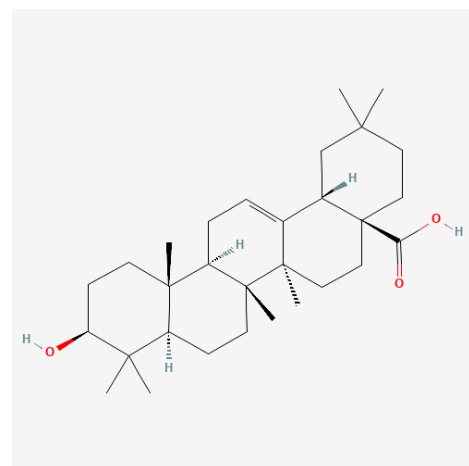

Oleanolic acid

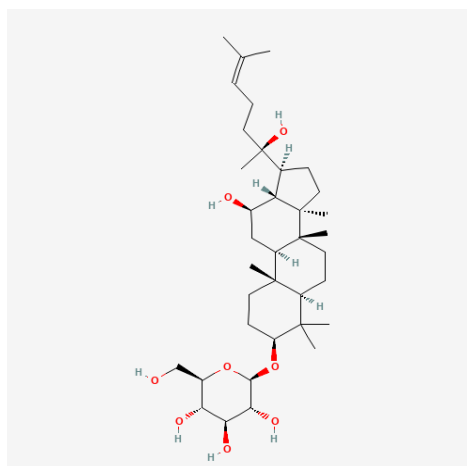

Ginsenoside-Rh2

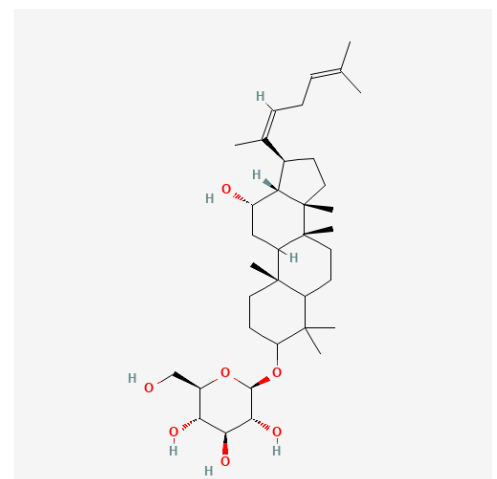

Ginsenoside-Rh3

***Tabebuia impetiginosa***

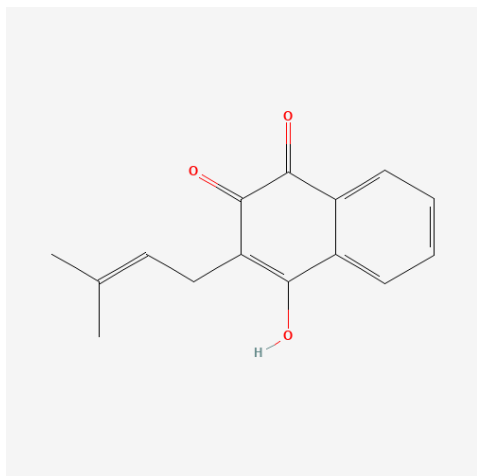

Lapachol

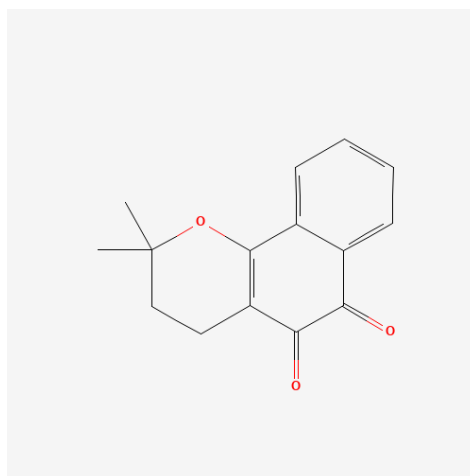

$\beta$ -lapachone

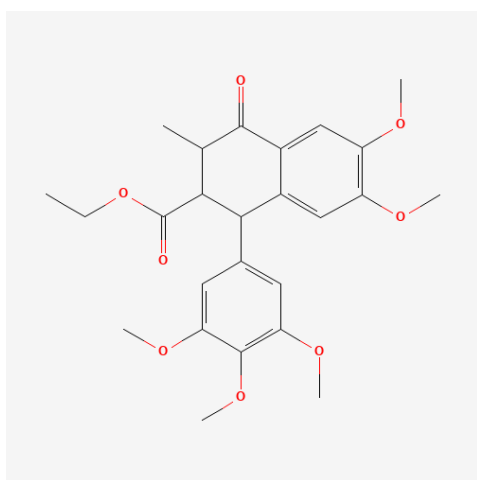

Lignan

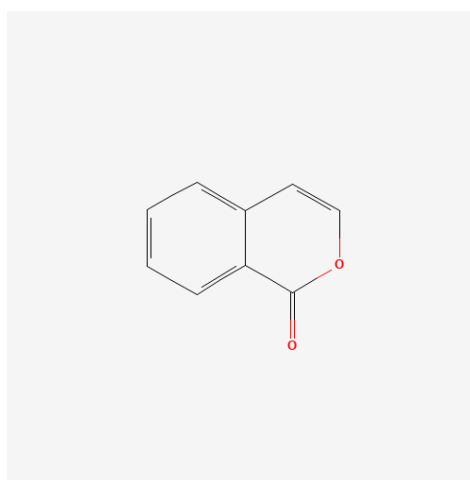

Isocoumarin

***Combretum caffrum***

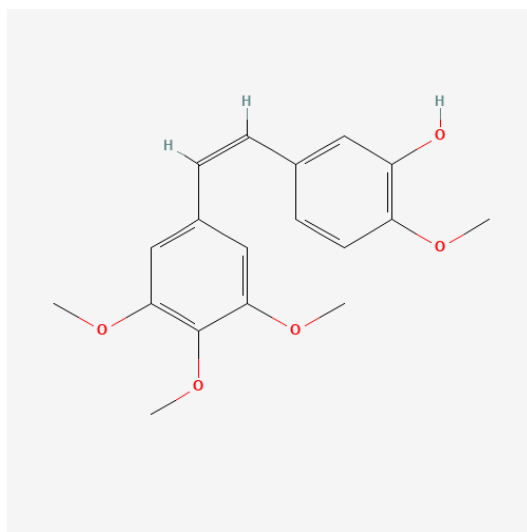

Combretastatin A4

***Chaga (Inonotus obliquus)***

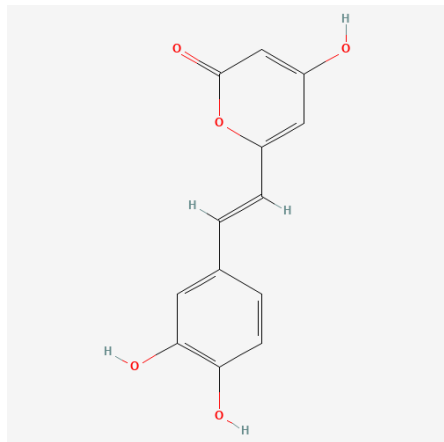

Hispidin

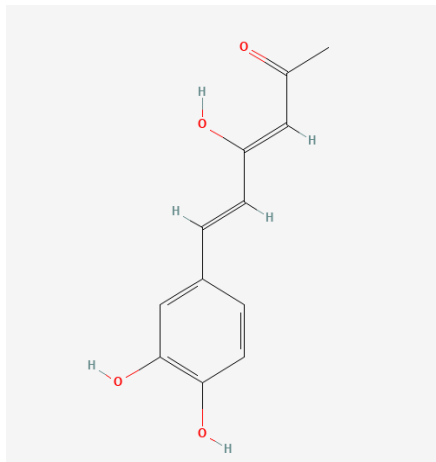

Hispolon

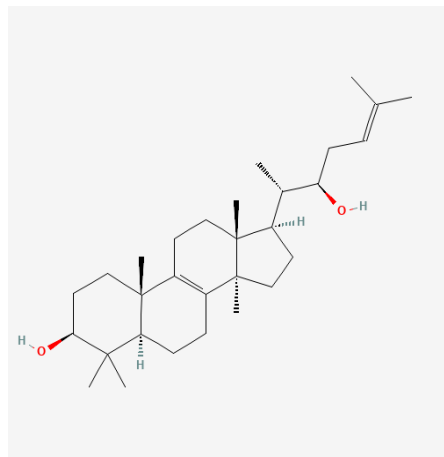

Inotodiol

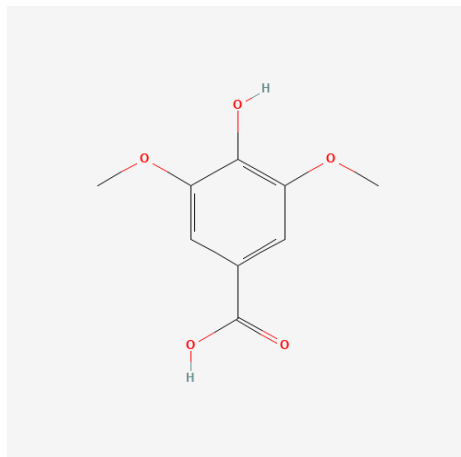

Syringic acid

***Reishi (Ganoderma lucidum)***

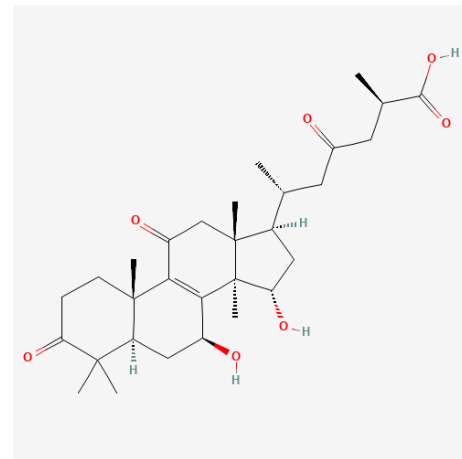

Ganoderic acid

***Cordyceps sinensis***

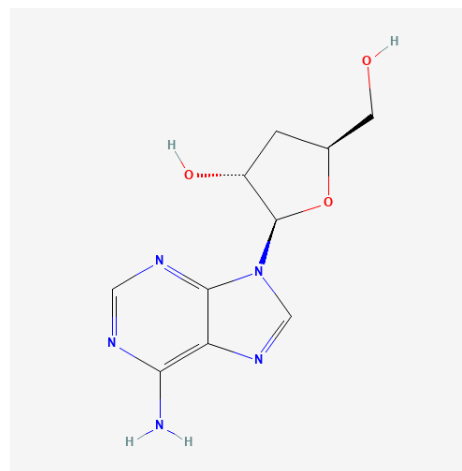

Cordycepin

***Shiitake (Lentinula edodes)***

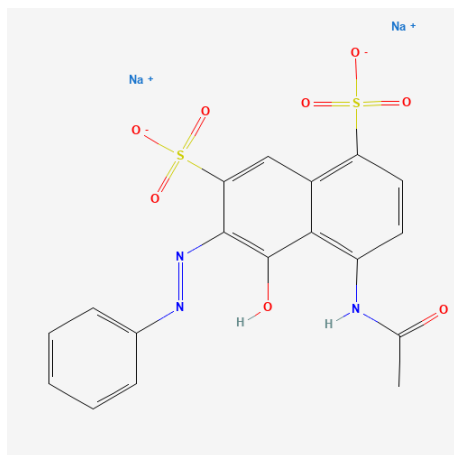

Lignin

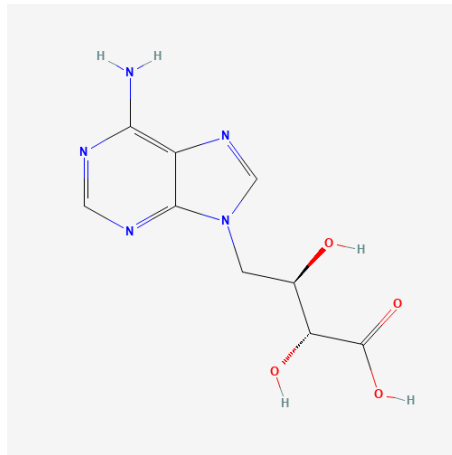

Erytadenine

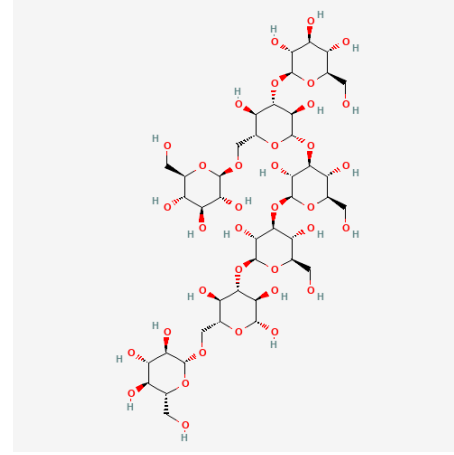

Lentinan
