# Supplementary material for: How Should the Worldwide Knowledge of Traditional Cancer Healing Be Integrated with Herbs and Mushrooms into Modern Molecular Pharmacology?
Source: MDPI journal article supplement (doi:10.3390/ph15070868), 2022-07-14
Supplement: s1 [file s1]

| Drug                       | Organism                                                                                                                | Malignancies which are treated                                                                                                                                                                                                                                                                                                                             | Mechanism                         |
|----------------------------|-------------------------------------------------------------------------------------------------------------------------|------------------------------------------------------------------------------------------------------------------------------------------------------------------------------------------------------------------------------------------------------------------------------------------------------------------------------------------------------------|-----------------------------------|
| Bleomycin sulfate          | <i>Streptomyces verticillus</i>                                                                                         | Hodgkin lymphoma, Non-Hodgkin lymphoma, Squamous cell carcinoma of the penis, Squamous cell carcinoma of the cervix, Squamous cell carcinoma of the head and neck, Squamous cell carcinoma of the vulva, Testicular cancer, Malignant pleural effusion                                                                                                     | Induced of DNA strand breaks      |
| Cabazitaxel                | Semi-synthetic derivative of a natural taxoids                                                                          | Prostate cancer                                                                                                                                                                                                                                                                                                                                            | Inhibitor of microtubule dynamics |
| Dactinomycin               | <i>Streptomyces parvulus</i>                                                                                            | Ewing sarcoma Gestational trophoblastic disease Rhabdomyosarcoma Solid tumors Testicular cancer Wilms tumor                                                                                                                                                                                                                                                | Inhibitor of transcription        |
| Daunorubicin hydrochloride | <i>Streptomyces coeruleorubidus</i> ,<br><i>Streptomyces peucetius</i>                                                  | Acute lymphoblastic leukemia Acute myeloid leukemia                                                                                                                                                                                                                                                                                                        | Inhibitor of topoisomerase II     |
| Docetaxel                  | Semi-synthetic analogue of paclitaxel (Taxol), which is derived from Pacific yew tree <i>Taxus brevifolia</i>           | Breast cancer, Non-small cell lung cancer, Prostate cancer, Squamous cell carcinoma of the head and neck, Stomach adenocarcinoma and gastroesophageal junction adenocarcinoma                                                                                                                                                                              | Inhibitor of microtubule dynamics |
| Doxorubicin hydrochloride  | <i>Streptomyces coeruleorubidus</i><br><i>Streptomyces peucetius</i>                                                    | Acute lymphoblastic leukemia (ALL), Acute myeloid leukemia (AML), Metastatic breast cancer, Gastric (stomach) cancer, Hodgkin lymphoma, Neuroblastoma, Non-Hodgkin lymphoma, Non-small cell lung cancer, Ovarian cancer, Small cell lung cancer, Soft tissue and bone sarcomas, Thyroid cancer, Bladder cancer, Kaposi's sarcoma, Wilms tumors, and others | Inhibits topoisomerase II         |
| Eribulin (Halaven)         | Fully synthetic macrocyclic ketone analogue of the marine natural product halichondrin B ( <i>Halichondria okadai</i> ) | Breast cancer Liposarcoma                                                                                                                                                                                                                                                                                                                                  | Inhibitor of microtubule dynamics |
| Etoposide                  | Semisynthetic derivative of podophyllotoxin, a natural compound from root of <i>Podophyllum peltatum</i>                | Small cell lung cancer, Testicular Cancer, Non-small Cell Lung Cancer, Hodgkin's Disease, Acute Myeloid Leukemia, Acute Lymphocytic Leukemia, Wilms' Tumor, Neuroblastoma, Kaposi's Sarcoma                                                                                                                                                                | Inhibitor of topoisomerase II     |
| Everolimus                 | <i>Streptomyces hygroscopicus</i>                                                                                       | Breast cancer, Pancreatic cancer, Gastrointestinal cancer, Lung cancer, Renal cell carcinoma, Subependymal giant cell astrocytoma                                                                                                                                                                                                                          | Inhibitor of mTOR                 |
| Idarubicin hydrochloride   | Semi-synthetic 4-demethoxy analogue of the antineoplastic anthracycline antibiotic daunorubicin                         | Acute myeloid leukemia (AML)                                                                                                                                                                                                                                                                                                                               | Inhibitor topoisomerase II,       |

|                                          |                                                                                                                                                                  |                                                                                                                        |                                                                                                                                                                                      |
|------------------------------------------|------------------------------------------------------------------------------------------------------------------------------------------------------------------|------------------------------------------------------------------------------------------------------------------------|--------------------------------------------------------------------------------------------------------------------------------------------------------------------------------------|
| <b>Irinotecan hydrochloride</b>          | Semisynthetic derivative of natural compound camptothecin which is found in the <i>Camptotheca acuminata</i>                                                     | Colorectal cancer, Pancreatic cancer                                                                                   | Inhibitor topoisomerase I                                                                                                                                                            |
| <b>Ixabepilone</b>                       | Ixabepilone is a semi-synthetic analog of epothilone B, a natural chemical compound produced by <i>Sorangium cellulosum</i>                                      | Breast cancer                                                                                                          | Inhibitor of microtubule dynamics                                                                                                                                                    |
| <b>Leucovorin calcium (Folinic acid)</b> | Was discovered as growth factor required for the bacterium <i>Leuconostoc citrovorum</i>                                                                         | Colorectal cancer Anemia                                                                                               | Prevent harmful effects of methotrexate. It allows some purine/pyrimidine synthesis and normal DNA replication in normal cells in the presence of dihydrofolate reductase inhibitors |
| <b>Midostaurin</b>                       | Semi-synthetic derivative of staurosporine, an alkaloid from the bacterium <i>Streptomyces staurosporeus</i>                                                     | Acute myeloid leukemia (AML), Aggressive systemic mastocytosis with associated hematologic neoplasm mast cell leukemia | Protein kinase inhibitor                                                                                                                                                             |
| <b>Mitomycin</b>                         | <i>Streptomyces caespitosus</i>                                                                                                                                  | Gastric (stomach) and pancreatic adenocarcinoma, Urothelial cancer                                                     | DNA crosslinker                                                                                                                                                                      |
| <b>Omacetaxine mepesuccinate</b>         | Semi-synthetic derivative of homoharringtonine (HHT) - a natural plant alkaloid derived from <i>Cephalotaxus fortunei</i>                                        | Chronic myelogenous leukemia                                                                                           | Inhibitor of translation                                                                                                                                                             |
| <b>Paclitaxel</b>                        | <i>Pacific yew</i>                                                                                                                                               | Various cancers                                                                                                        | Inhibitor of microtubule dynamics                                                                                                                                                    |
| <b>Romidepsin</b>                        | Natural product obtained from the bacterium <i>Chromobacterium violaceum</i>                                                                                     | Cutaneous T-cell lymphoma                                                                                              | Inhibitor of histone deacetylases                                                                                                                                                    |
| <b>Asparaginase</b>                      | Enzyme from <i>Erwinia chrysanthemi</i>                                                                                                                          | Acute lymphoblastic leukemia                                                                                           | Depletion of asparagine amino acid                                                                                                                                                   |
| <b>Temsirolimus</b>                      | Temsirolimus is an ester derived from rapamycin - (Sirolimus) which is a natural macrocyclic lactone produced by the bacterium <i>Streptomyces hygroscopicus</i> | Renal cell carcinoma                                                                                                   | Inhibitor of mTOR                                                                                                                                                                    |
| <b>topotecan hydrochloride</b>           | Synthetic, water-soluble analog of the natural chemical compound camptothecin                                                                                    | Cervical cancer, Ovarian cancer, Small cell lung cancer                                                                | Inhibitor of topoisomerase I                                                                                                                                                         |
| <b>Tabectedin</b>                        | Semisynthetic antibiotic obtained from the bacterium <i>Pseudomonas fluorescens</i>                                                                              | Liposarcoma and leiomyosarcoma                                                                                         | Blocks oncogenic transcription factor FUS-CHOP binding with DNA                                                                                                                      |

|                             |                                                  |                                                                                                                                               |                                   |
|-----------------------------|--------------------------------------------------|-----------------------------------------------------------------------------------------------------------------------------------------------|-----------------------------------|
| <b>Valrubicin</b>           | Semi-synthetic analog of the doxorubicin         | Bladder cancer                                                                                                                                | Inhibitor of topoisomerase II.    |
| <b>Vinblastine sulfate</b>  | Madagascar periwinkle <i>Catharanthus roseus</i> | Breast cancer, Choriocarcinoma, Hodgkin lymphoma, Kaposi sarcoma,<br>Non-Hodgkin lymphoma, Testicular germ cell tumors, other<br>malignancies | Inhibitor of microtubule dynamics |
| <b>Vincristine sulfate</b>  | Madagascar periwinkle <i>Catharanthus roseus</i> | Acute leukemia. Hodgkin lymphoma.<br>Neuroblastoma.<br>Non-Hodgkin lymphoma (NHL).<br>Rhabdomyosarcoma.<br>Wilms tumor.                       | Inhibitor of microtubule dynamics |
| <b>Vinorelbine tartrate</b> | Semi-synthetic derivative of vinca alkaloids     | Non-small cell lung cancer                                                                                                                    | Inhibitor of microtubule dynamics |
